# Supplementary material for: The Thrombopoietin Receptor Agonist Eltrombopag Inhibits Human Cytomegalovirus Replication Via Iron Chelation
Source: PubMed Central journal article supplement (PMC7017049; doi:10.3390/cells9010031), 2019-12-20
Supplement: cells-09-00031-s001.pdf [file cells-09-00031-s001.pdf]

# Figure S1

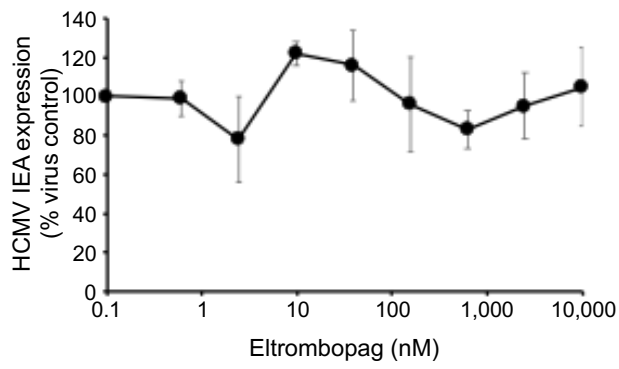

**Figure 1.** Effects of eltrombopag on HCMV immediate early antigen (IEA) expression in primary human foreskin fibroblasts (HFFs).

**Table S1.** Effects of eltrombopag addition at different time points during the HCMV replication cycle using human foreskin fibroblasts infected with HCMV strain Hi91 at an MOI of 0.02.

| <b>Time of drug addition</b>             | <b>IC<sub>50</sub><sup>1</sup> (nM)</b> |
|------------------------------------------|-----------------------------------------|
| Continuous starting from virus infection | 415 ± 197                               |
| 24h pre-treatment                        | > 10                                    |
| During the 1h virus adsorption period    | 8,979 ± 1153                            |
| 1h post infection                        | 233 ± 35                                |
| 24h post infection                       | 358 ± 105                               |
| 48h post infection                       | 2,493 ± 795                             |

<sup>1</sup> Concentration that reduces HCMV late antigen expression by 50%

**Table S2.** Effects of eltrombopag in combination with deferasirox and foscarnet. Combination indices (CIs) at different levels of inhibition and weighted average CI values ( $CI_{wt}$ ) calculated as  $(CI_{50} + 2 \times CI_{75} + 3 \times CI_{90} + 4 \times CI_{95}) / 10$  [24] are provided.  $CI_{wt}$  values  $\leq 0.7$  indicate synergistic effects,  $CI_{wt}$  values  $> 0.7$  and  $\leq 0.9$  moderately synergistic effects,  $CI_{wt}$  values  $> 0.9$  and  $\leq 1.2$  additive effects,  $CI_{wt}$  values  $> 1.2$  and  $\leq 1.45$  moderately antagonistic effects, and  $CI_{wt}$  values  $> 1.45$  antagonistic effects [24]

|               | $CI_{50}$       | $CI_{75}$      | $CI_{90}$       | $CI_{95}$        | $CI_{WT}$ | Combined effect |
|---------------|-----------------|----------------|-----------------|------------------|-----------|-----------------|
| Eltrombopag + |                 |                |                 |                  |           |                 |
| Deferasirox   | $4.22 \pm 1.4$  | $6.12 \pm 1.2$ | $9.03 \pm 0.85$ | $11.9 \pm 1.7$   | 9.11      | antagonistic    |
| Foscarnet     | $2.51 \pm 0.35$ | $1.1 \pm 0.2$  | $0.45 \pm 0.1$  | $0.25 \pm 0.044$ | 0.7       | synergistic     |

**Table S3.** Effects of eltrombopag on HCMV late antigen (LA) expression in different cell types infected with different virus strains and isolates as determined 120h post infection. Concentrations that reduce LA expression by 50% (IC<sub>50</sub>) or 90% (IC<sub>90</sub>) are provided. The investigated eltrombopag concentrations did not affect cell viability. The eltrombopag concentration that reduced cell viability by 50% (CC<sub>50</sub>) was >25,000nM for HFFs and 17,872 ± 1,302nM for ASCs.

| Virus strain | Eltrombopag IC <sub>50</sub> (nM) |                   |
|--------------|-----------------------------------|-------------------|
|              | HFFs                              | ASCs              |
| Hi91         | 415 ± 197 (>60) <sup>1</sup>      | 4331 ± 1450 (4.1) |
| Davis        | 1182 ± 38 (>21)                   | 265 ± 77 (67)     |
| Towne        | 4230 ± 257 (>5.9)                 | 2303 ± 616 (7.7)  |
| U1           | 110 ± 7 (>227)                    | 99 ± 30 (181)     |
| U59          | 3372 ± 1253 (>7.4)                | 296 ± 84 (60)     |
| U75          | 389 ± 93 (>64)                    | 1828 ± 491 (9.8)  |

<sup>1</sup> Selectivity index (CC<sub>50</sub>/ IC<sub>50</sub>)

| Virus strain | Eltrombopag IC <sub>90</sub> (nM) |             |
|--------------|-----------------------------------|-------------|
|              | HFFs                              | ASCs        |
| Hi91         | 3379 ± 1088                       | 9506 ± 2797 |
| Davis        | 7086 ± 2796                       | 9473 ± 1832 |
| Towne        | 8683 ± 940                        | 9697 ± 1428 |
| U1           | 1621 ± 127                        | 680 ± 129   |
| U59          | >10000                            | 9237 ± 2051 |
| U75          | 3578 ± 752                        | >10000      |
